# Supplementary material for: Ti/TiO2/SiO2 Multilayer Thin Films With Enhanced Spectral Selectivity For Optical Applications
Source: Research Square preprint supplement (doi:10.21203/rs.3.rs-879841/v1), 2021-09-20

Supplementary Material

**Ti/TiO2/SiO2 multilayer thin films with enhanced spectral selectivity for optical applications**

Dongju Kim1, +, Junho Lee1, Deahyeon Ko1, Kyoung Ryeol Park2, Dongwon Kim1, Jennifer S Forrester3, Jong Cheol Kim4, *, Sungwook Mhin1, *

1 Department of Advanced Materials Engineering, Kyonggi University, Suwon 16227, Republic of Korea

2 Department of Materials Science and Engineering, Hanyang University, 222 Wangsimni-ro, Seoul, 04763, Republic of Korea

3 Analytical Instrument Facility, North Carolina State University, Raleigh, North Carolina 27695, USA

4 Daegu Mechatronics & Materials Institute, 11 Seongseogongdan-ro, Daegu, 42714, Republic of Korea

+These author’s contributed equality to this work.

*Correspondence and requests for materials should be addressed to S. M (email: [swmhin@kgu.ac.kr](mailto:swmhin@kgu.ac.kr)) or J. C. K (email: [jckim@dmi.re.kr](mailto:jckim@dmi.re.kr))

**Figure captions.**

**Figure. S1.** XRD patterns of (a) TiO2 thin film, and (b) SiO2 thin film.

**Figure. S2.** Process and mechanism for the formation of dense thin films by Pulsed-DC reactive sputtering: (a) Ti thin film, (b) TiO2 thin film, (c) SiO2 thin film.

**Figure. S3.** Refractive Index (n) and Extinction Coefficient (k) as a function of sputtering parameters: (a) Ti thin film, (b) TiO2 thin film, (c) SiO2 thin film.

**Figure. S4.** Morphology and transmittance spectra of multi-layered structures of Ti/TiO2/SiO2 films with 7-8 layers: (a) Cross-sectional SEM micrograph of multilayer film with Ti 4 nm (b) Cross-sectional SEM micrograph of multilayer film with Ti 8 nm, and (c) Cross-sectional SEM micrograph of multilayer film with Ti 11 nm.

**Figure. S5.** Morphology and layer thickness multi-layered structure of TiO2/SiO2 films with 23 layers.

**Figure. S6.** Transmittance spectra of multilayer films of (a) TiO2/SiO2 films with 23-layers, (b) Ti/TiO2/SiO2 films with 24-layers. (c) 25-layers, and (d) 26-layers.

**Figure. S1.**


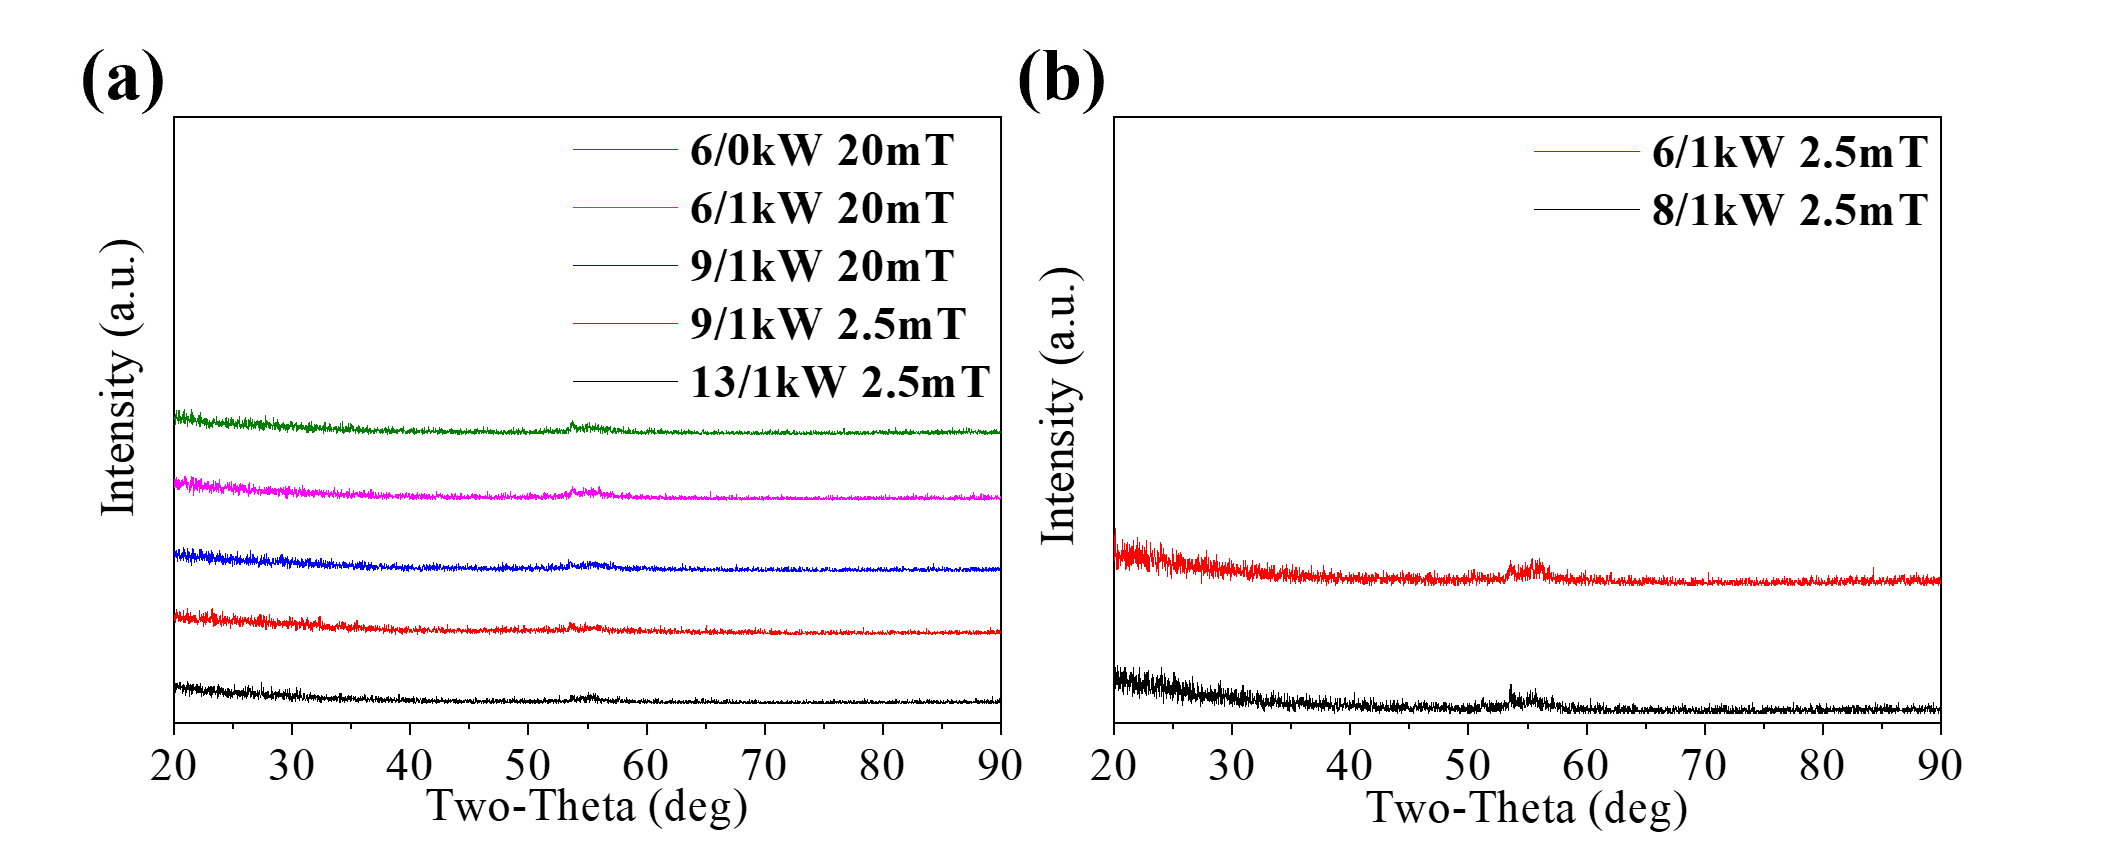


**Figure. S2.**


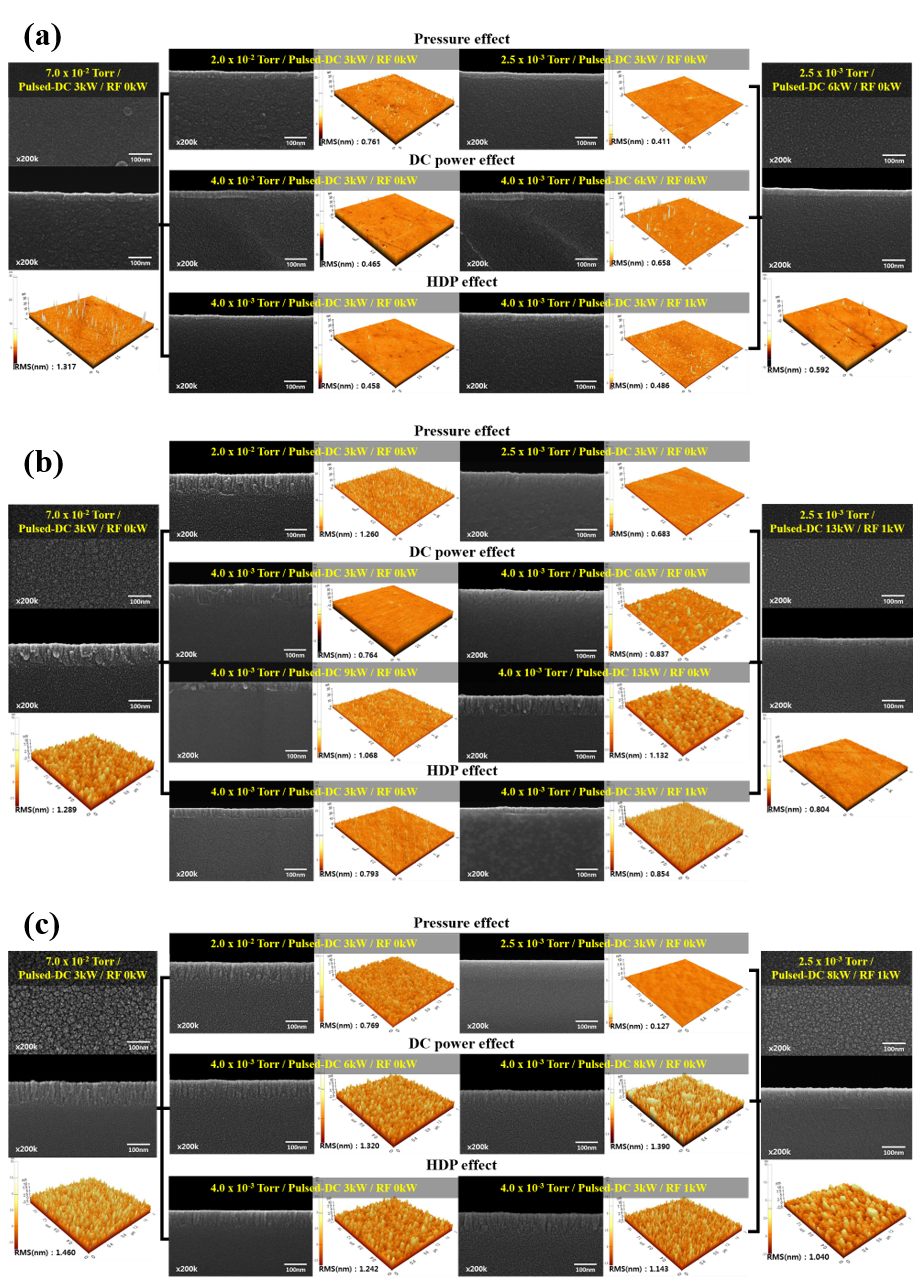


**Figure. S3.**


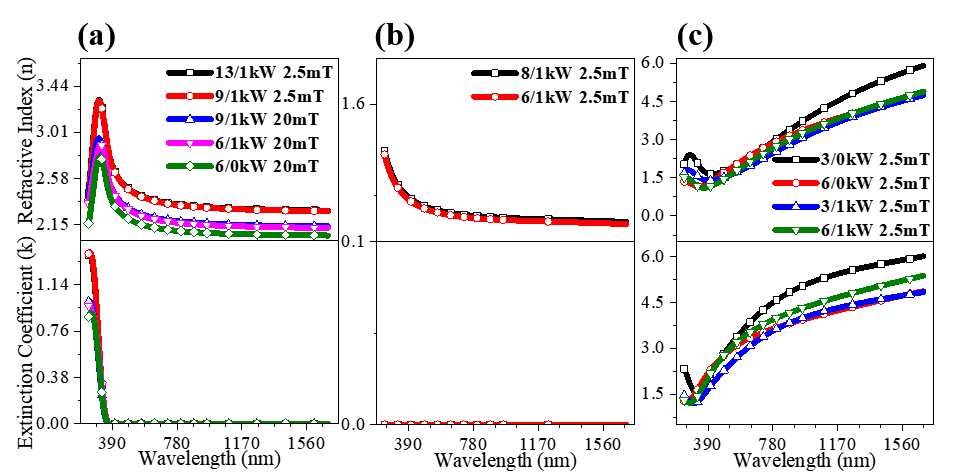


**Figure. S4.**


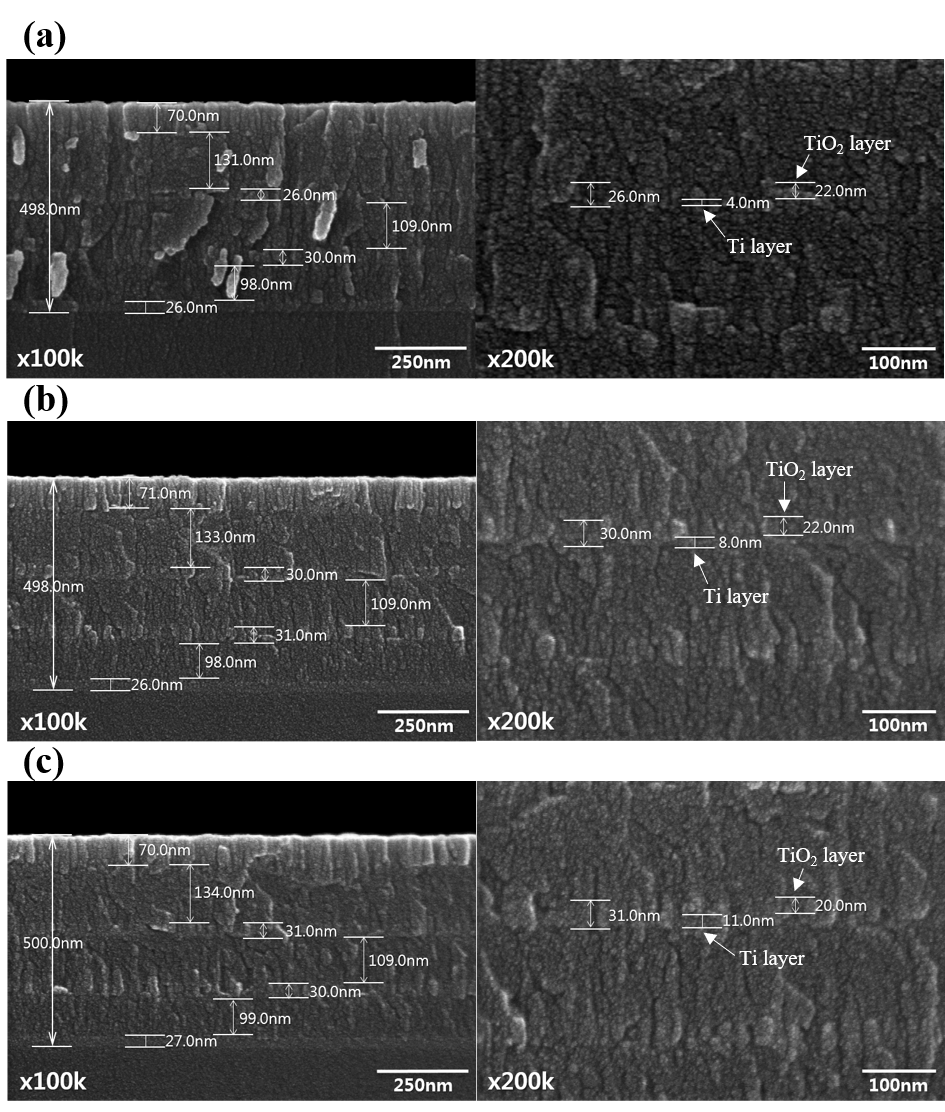


**Figure. S5.**


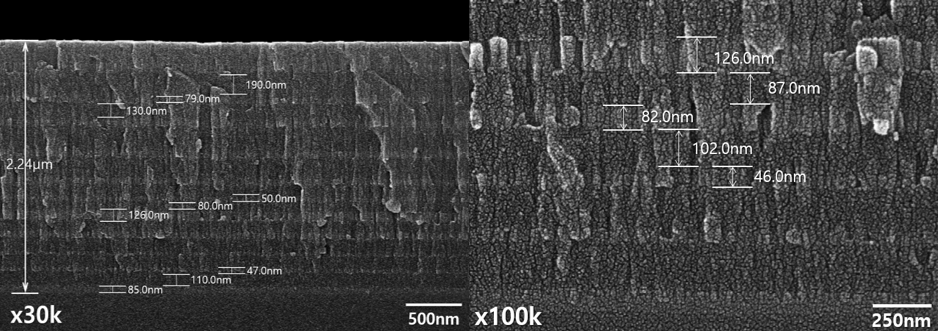


**Figure. S6.**


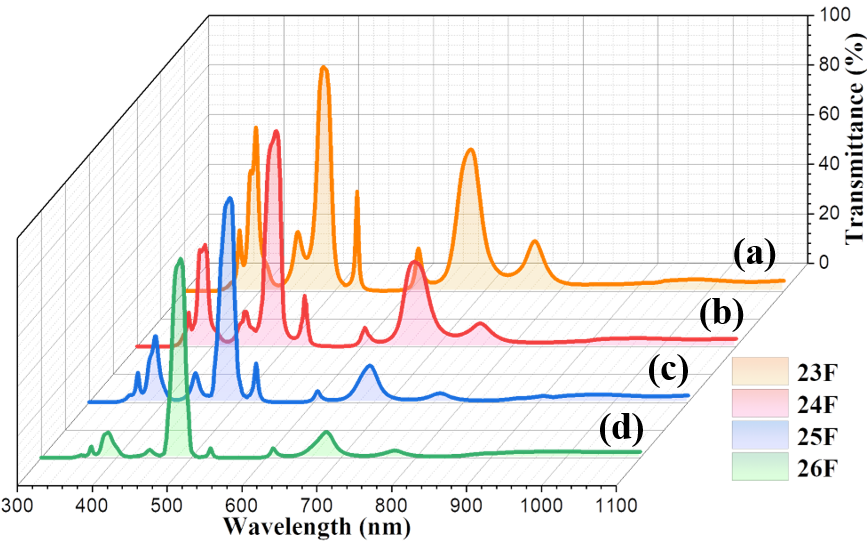

Supplement: Supplementary file 1 [file 62eb1d7c896635dfd33020df.docx]
